# Supplementary material
Source: publisher site journal article supplement (https://www.spandidos-publications.com/8653/downloadSupplementary)

Figure S1. Time-dependent ROC curves of the TNM and TNM-low SM models for overall survival at 1, 3 and 5 years. AUC values are presented as numerical values with 95% confidence intervals. ROC, receiver operating characteristic; AUC, area under the curve; SM, skeletal muscle mass.

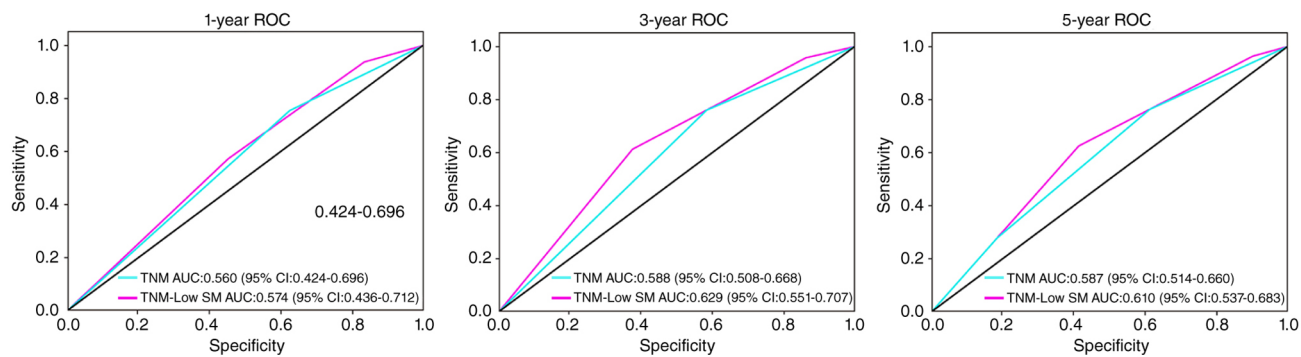

Supplement: Supplementary file 1 [file downloadSupplementary]
